# Supplementary material for: Effect of enzymatic treatment of citrus by-products on bacterial growth, adhesion and cytokine production by Caco-2 cells
Source: Royal Society of Chemistry journal article supplement (doi:10.1039/d0fo01963a), 2020-01-01
Supplement: d0fo01963a1.pdf [file d0fo01963a1.pdf]

## Supplementary material

**Table S1**

Pearson's correlation coefficient ( $r$ ) between sample concentration and growth of *Bifidobacterium lactis*, *Lactobacillus casei*, *Lactobacillus rhamnosus*, and *Lactobacillus acidophilus*.

| Sample     | <i>B. lactis</i>     | <i>L. casei</i>     | <i>L. rhamnosus</i>  | <i>L. acidophilus</i> |
|------------|----------------------|---------------------|----------------------|-----------------------|
| CJB-nE     | 0.584*               | 0.640*              | 0.112 <sup>ns</sup>  | 0.887*                |
| CJB-E      | 0.642*               | 0.234 <sup>ns</sup> | -0.353 <sup>ns</sup> | 0.904*                |
| CPB-nE     | -0.666*              | -0.702*             | -0.800 <sup>ns</sup> | 0.582*                |
| CPB-E      | -0.512*              | -0.874*             | -0.653 <sup>ns</sup> | 0.935*                |
| Glucose    | 0.516*               | -0.844*             | 0.146 <sup>ns</sup>  | 0.797*                |
| Inulin     | 0.704*               | -0.799*             | -0.527*              | 0.652*                |
| Naringin   | -0.777*              | -0.884*             | -0.921*              | 0.847*                |
| Naringenin | -0.847*              | -0.688*             | -0.884*              | 0.881*                |
| Hesperidin | 0.078 <sup>ns</sup>  | -0.768*             | -0.936*              | 0.853*                |
| Hesperetin | -0.123 <sup>ns</sup> | -0.730*             | -0.872*              | 0.895*                |

Abbreviations: ns, not significant; \*  $P \leq 0.05$ ; CJB-nE, citrus juice by-product non-enzymatic extract; CJB-E, citrus juice by-product enzymatic extract; CPB-nE, citrus pectin by-product non-enzymatic extract; and CPB-E, citrus pectin by-product enzymatic extract.

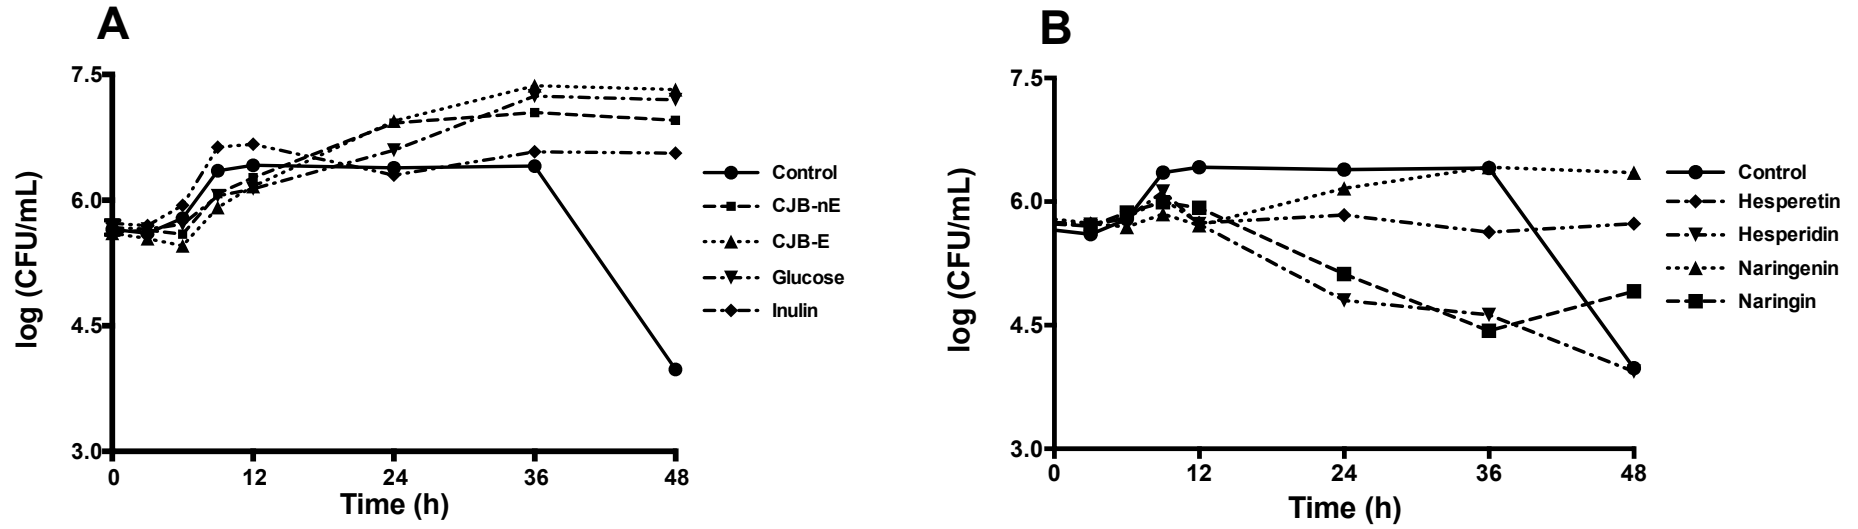

**Fig. S1.** Effect of citrus extracts (A) and flavanones (B) on *Lactobacillus acidophilus* La5 growth.

Control, MRS broth without glucose; CJB-nE, citrus juice by-product non-enzymatic extract; CJB-E, citrus juice by-product enzymatic extract.

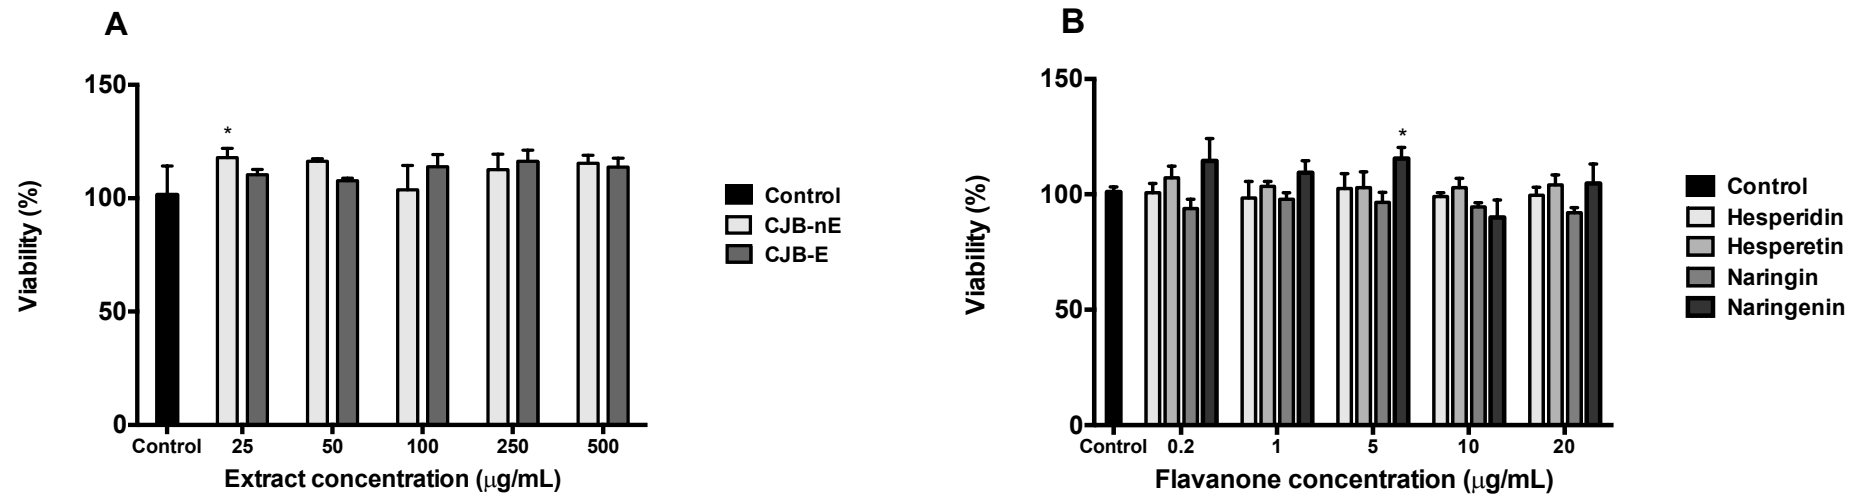

**Fig. S2.** Viability of Caco-2 cells treated with citrus extracts (CJB-nE and CJB-E) and flavanones.

\*Significantly different from control ( $P \leq 0.05$ , one-way ANOVA and Tukey's post-hoc test). Control, MRS broth without glucose; CJB-nE, citrus juice by-product non-enzymatic extract; CJB-E, citrus juice by-product enzymatic extract; CPB-nE, citrus pectin by-product non-enzymatic extract; and CPB-E, citrus pectin by-product enzymatic extract.
